# Supplementary material for: The Interleukin 3 Gene (IL3) Contributes to Human Brain Volume Variation by Regulating Proliferation and Survival of Neural Progenitors
Source: PLOS journal article supplement (doi:10.1371/journal.pone.0050375), 2012-11-30

**Figure S1.** Linkage disequilibrium (LD) pattern of the studies SNPs in Chinese (CHB) and Europeans (CEU).

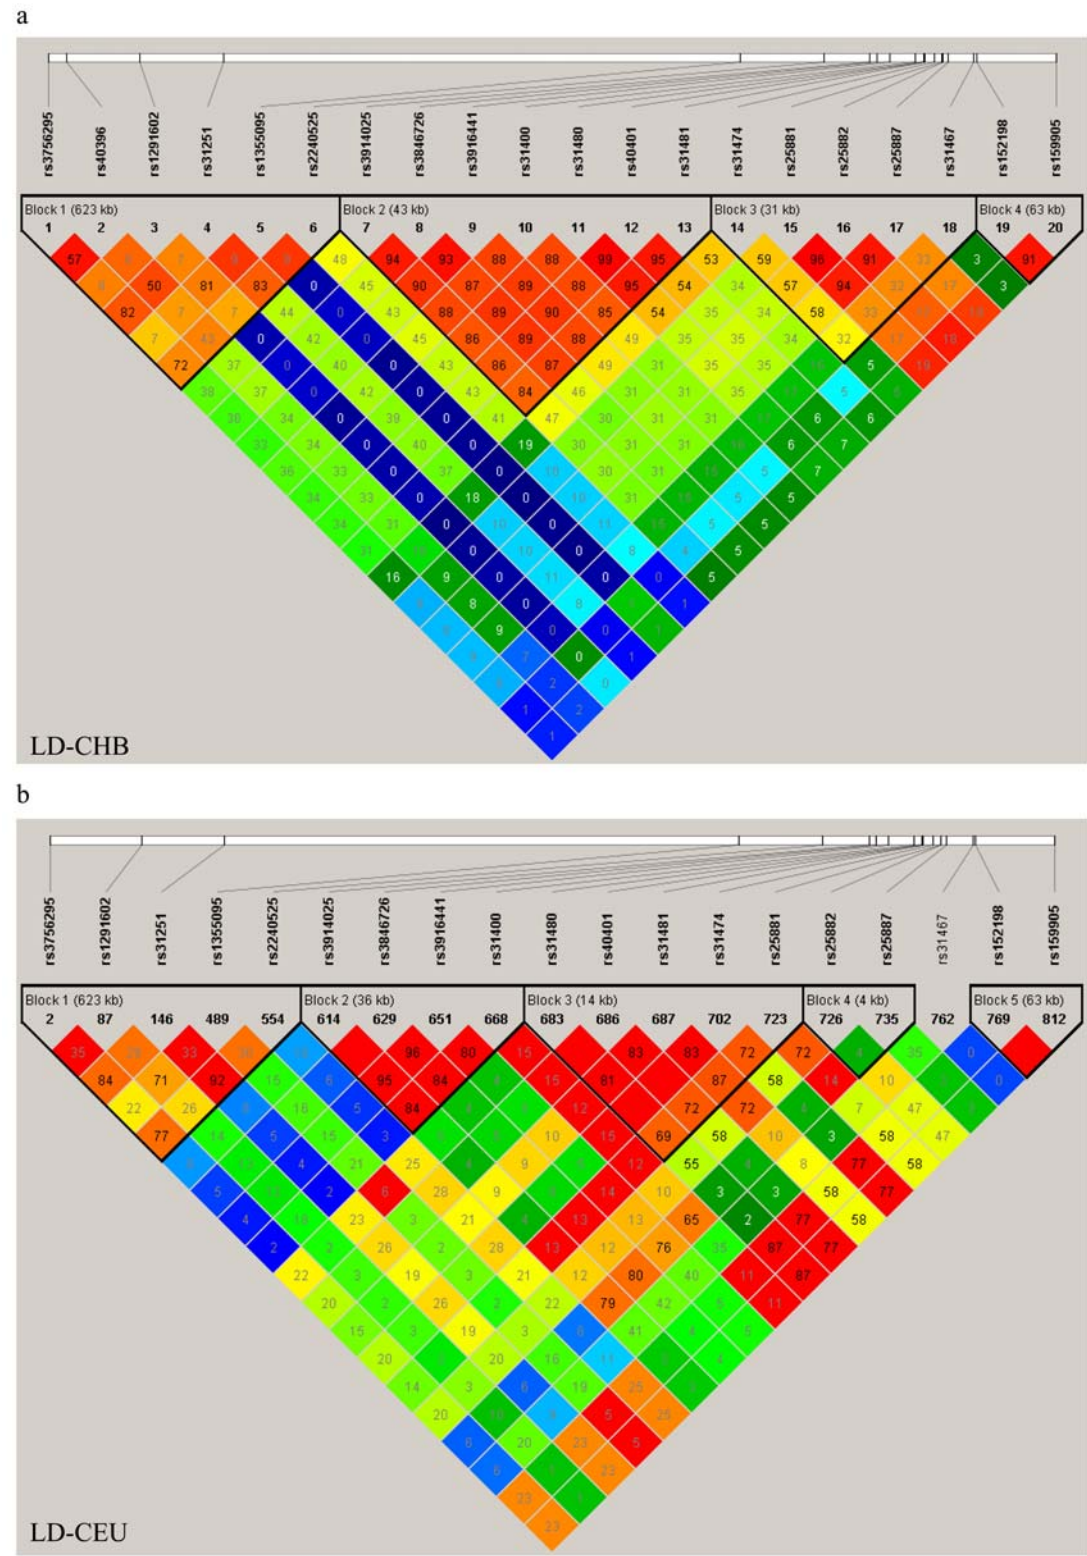

Supplement: S1 (10.1371/journal.pone.0050375.s001) [file journal.pone.0050375.s001]
