# Supplementary material for: The Interleukin 3 Gene (IL3) Contributes to Human Brain Volume Variation by Regulating Proliferation and Survival of Neural Progenitors
Source: PLOS journal article supplement (doi:10.1371/journal.pone.0050375), 2012-11-30

**Figure S3.** Impacts of rs31480 on promoter activity in CHO, SK-N-SH and COS-7 cell lines.

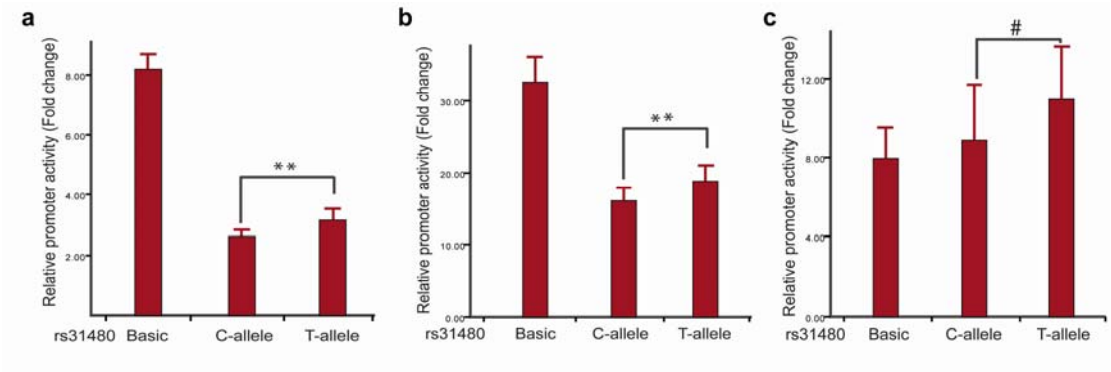

Supplement: S3 (10.1371/journal.pone.0050375.s003) [file journal.pone.0050375.s003]
