# Supplementary material for: The Interleukin 3 Gene (IL3) Contributes to Human Brain Volume Variation by Regulating Proliferation and Survival of Neural Progenitors
Source: PLOS journal article supplement (doi:10.1371/journal.pone.0050375), 2012-11-30

**Figure S7.** IL3RA is expressed in hilus of dentate gyrus.

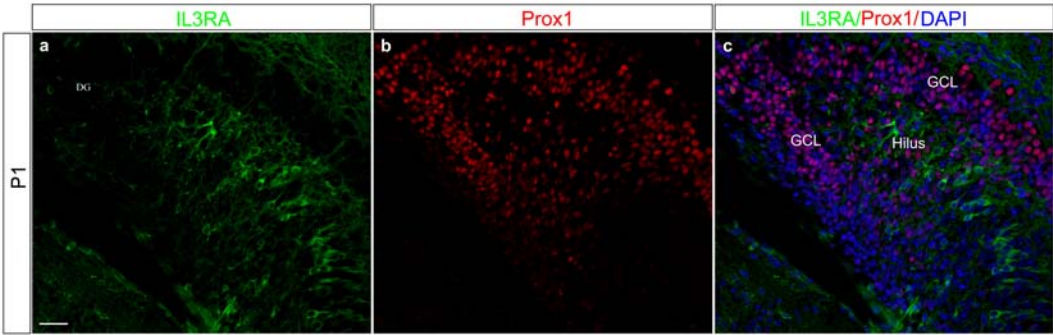

Supplement: S7 (10.1371/journal.pone.0050375.s007) [file journal.pone.0050375.s007]
