# Supplementary material for: The Interleukin 3 Gene (IL3) Contributes to Human Brain Volume Variation by Regulating Proliferation and Survival of Neural Progenitors
Source: PLOS journal article supplement (doi:10.1371/journal.pone.0050375), 2012-11-30

**Figure S8.** Double immunostaining of IL3RA and SOX2 revealed co-localization of IL3RA and sox 2 in developing mouse brain.

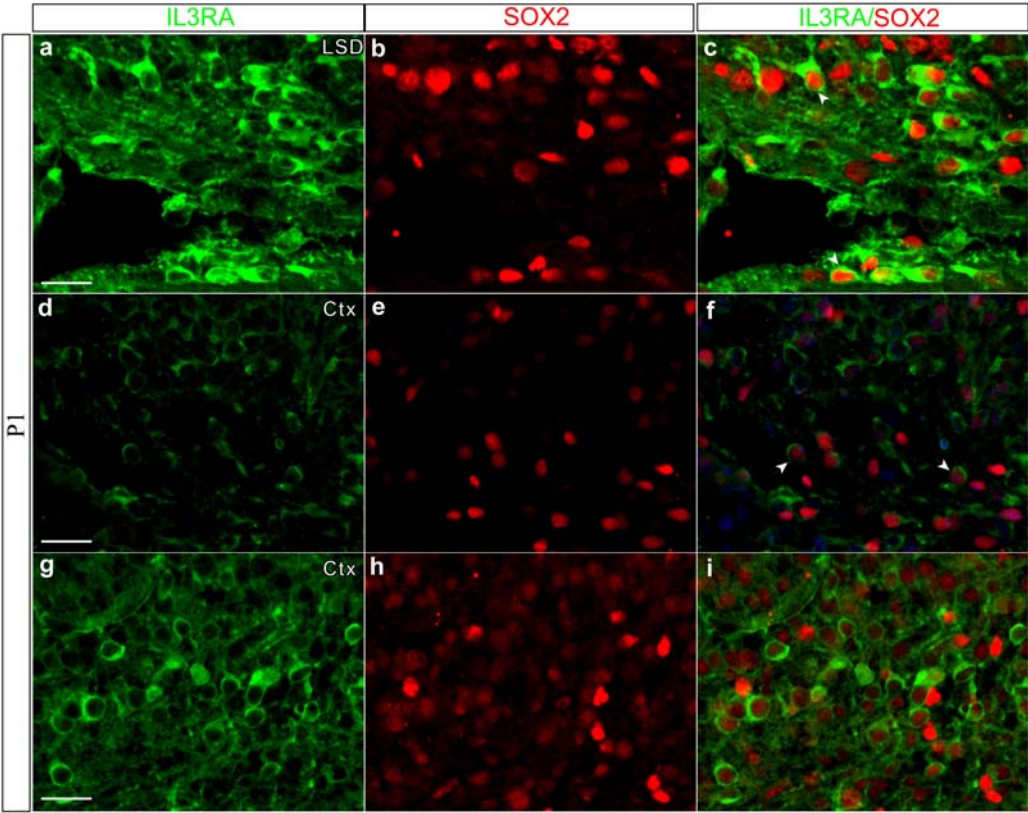

Supplement: S8 (10.1371/journal.pone.0050375.s008) [file journal.pone.0050375.s008]
