# Supplementary material for: The Interleukin 3 Gene (IL3) Contributes to Human Brain Volume Variation by Regulating Proliferation and Survival of Neural Progenitors
Source: PLOS journal article supplement (doi:10.1371/journal.pone.0050375), 2012-11-30

**Figure S9.** Co-expression of IL3RA and IL3RB in mouse brain.

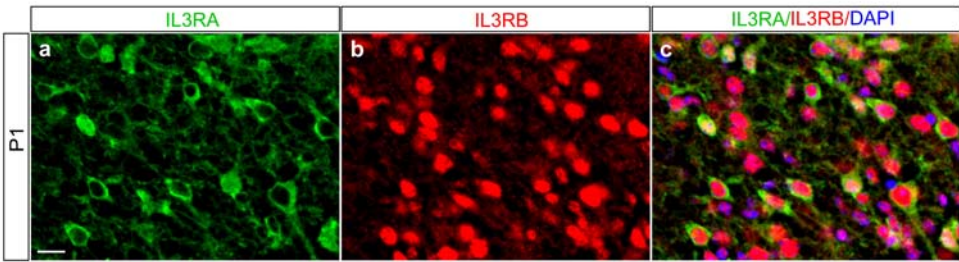

Supplement: S9 (10.1371/journal.pone.0050375.s009) [file journal.pone.0050375.s009]
