# Supplementary material for: The Interleukin 3 Gene (IL3) Contributes to Human Brain Volume Variation by Regulating Proliferation and Survival of Neural Progenitors
Source: PLOS journal article supplement (doi:10.1371/journal.pone.0050375), 2012-11-30

**Figure S11.** Double immunostaining analysis of IL3RA and Tuj1 in the developing mouse brain.

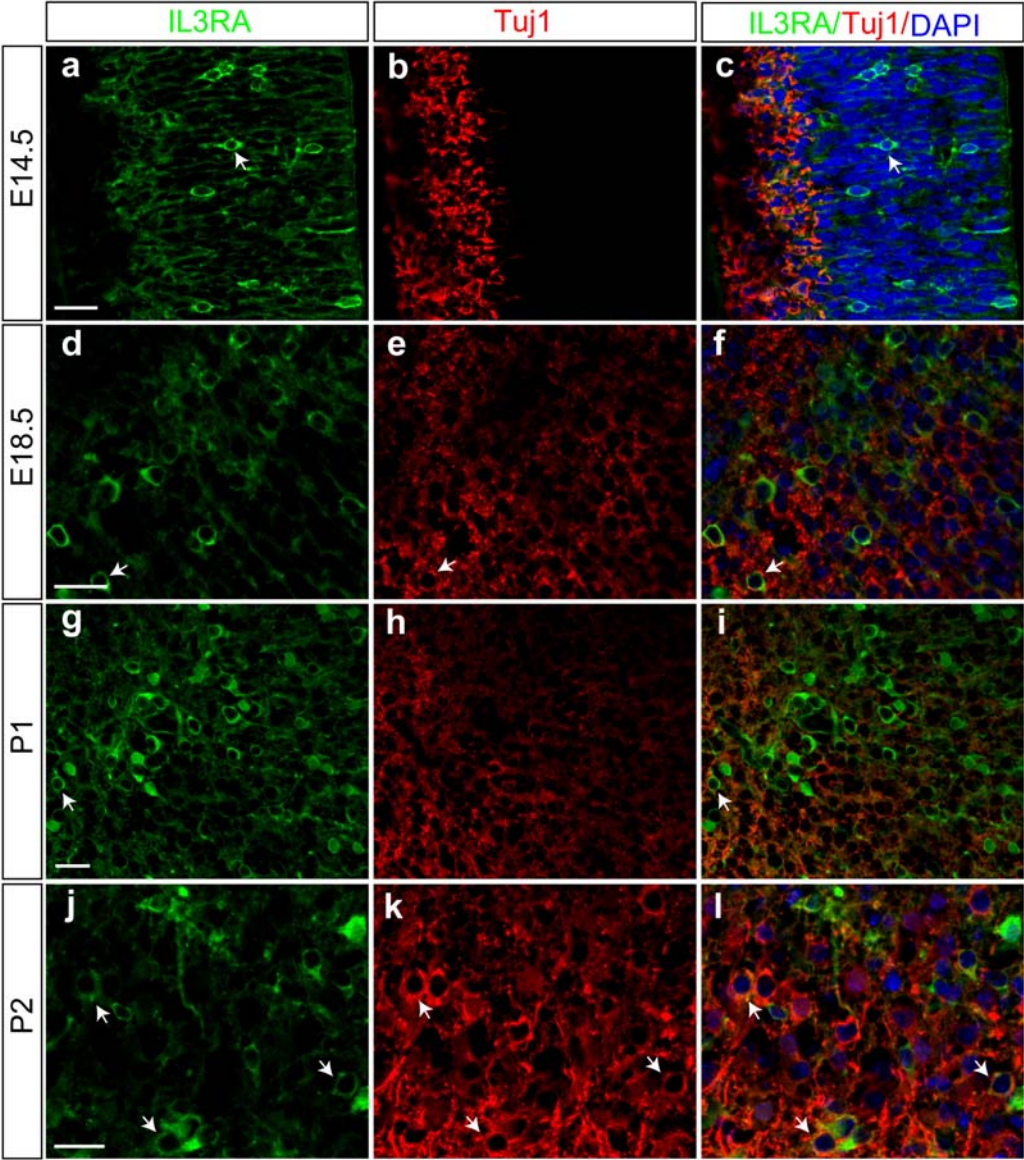

Supplement: S11 (10.1371/journal.pone.0050375.s011) [file journal.pone.0050375.s011]
