# Supplementary material for: The Interleukin 3 Gene (IL3) Contributes to Human Brain Volume Variation by Regulating Proliferation and Survival of Neural Progenitors
Source: PLOS journal article supplement (doi:10.1371/journal.pone.0050375), 2012-11-30

**Figure S12.** IL3RA is expressed in immediate progenitor cells (IPCs).

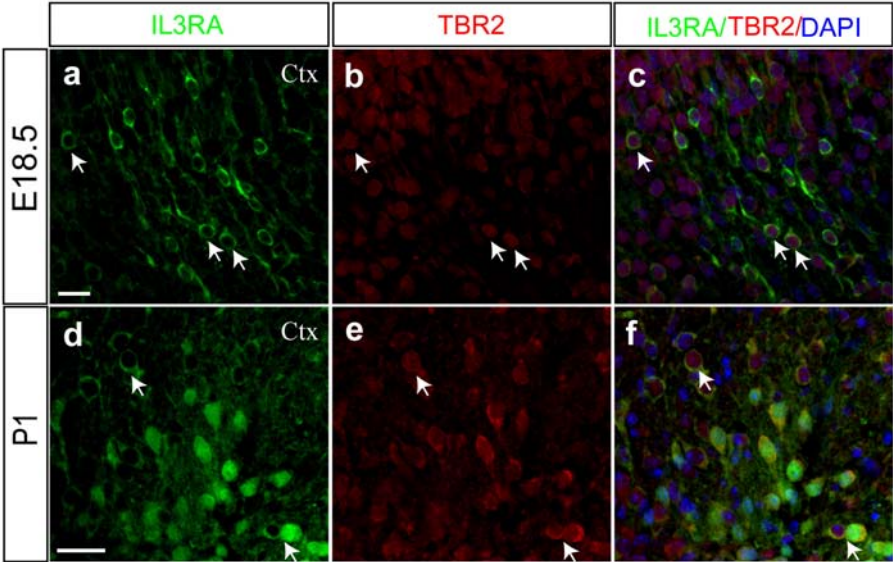

Supplement: S12 (10.1371/journal.pone.0050375.s012) [file journal.pone.0050375.s012]
