# Supplementary material for: The Interleukin 3 Gene (IL3) Contributes to Human Brain Volume Variation by Regulating Proliferation and Survival of Neural Progenitors
Source: PLOS journal article supplement (doi:10.1371/journal.pone.0050375), 2012-11-30

**Figure S15.** Expression of IL3 receptors (IL3RA and IL3RB) in cultured neural progenitors and trophic effects of IL-3 on neural progenitors and neurons.

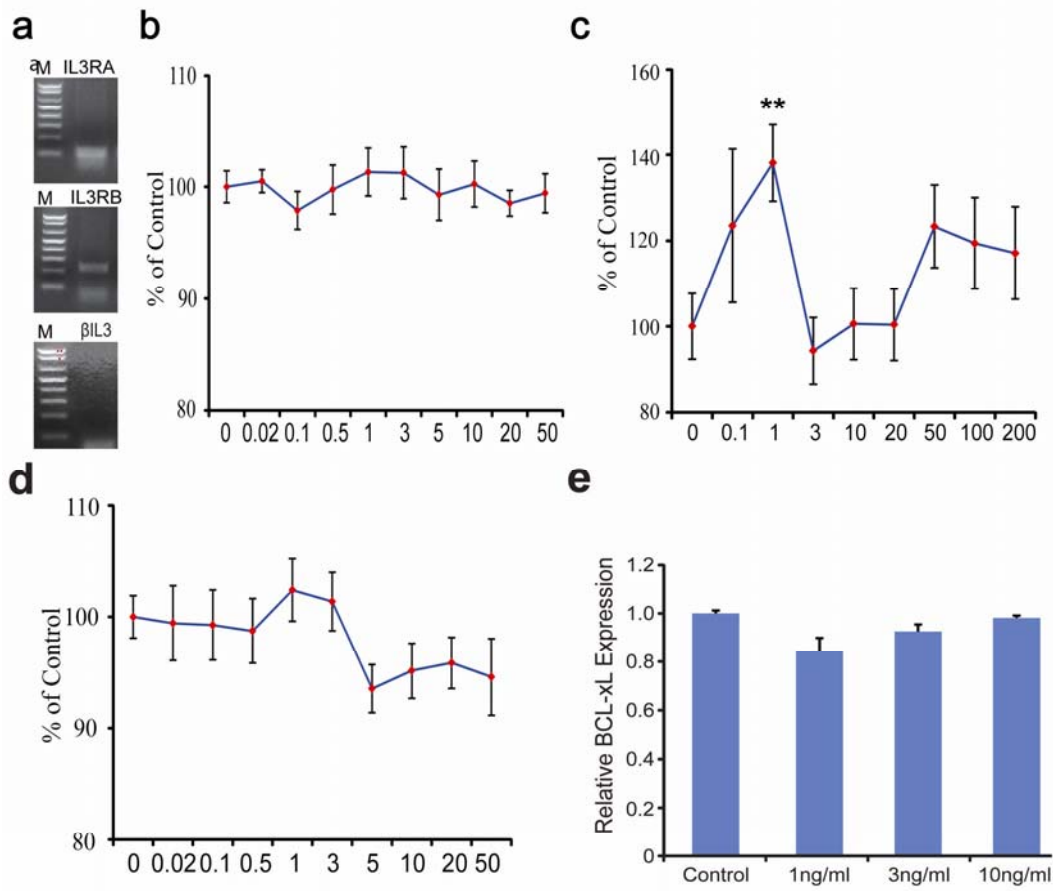

Supplement: S15 (10.1371/journal.pone.0050375.s015) [file journal.pone.0050375.s015]
